# Supplementary material for: Novel Roles for Notch3 and Notch4 Receptors in Gene Expression and Susceptibility to Ozone-Induced Lung Inflammation in Mice
Source: PubMed Central journal article supplement (PMC4529014; doi:10.1289/ehp.1408852), 2015-02-06
Supplement: ehp.1408852.s001.508.pdf [file ehp.1408852.s001.508.pdf]

## **Supplemental Material**

### **Novel Roles for Notch3 and Notch4 Receptors in Gene Expression and Susceptibility to Ozone-Induced Lung Inflammation in Mice**

Kirsten C. Verhein, Zachary McCaw, Wesley Gladwell, Shweta Trivedi, Pierre R. Bushel, and Steven R. Kleeberger

#### **Table of Contents**

**Figure S1.** EPIG analysis thumbnail images Page 3

**Table S1.** Bronchoalveolar lavage phenotype data Page 4

#### **Additional Excel Files**

##### **Supplemental Material, Table S2. ANOVA analysis results**

This Excel file includes 4 separate tables in individual worksheets:

- Supplemental Table S2, WT.N3.N4 Air. Genes identified by ANOVA that are significantly differentially expressed in air-exposed mice of all genotypes.
- Supplemental Table S2, WT Air vs Ozone. Genes identified by ANOVA that are significantly differentially expressed in wild type mice after ozone.
- Supplemental Table S2, Notch3 KO Air vs Ozone. Genes identified by ANOVA that are significantly differentially expressed in *Notch3*<sup>-/-</sup> mice after ozone.
- Supplemental Table S2, Notch4 KO Air vs Ozone. Genes identified by ANOVA that are significantly differentially expressed in *Notch4*<sup>-/-</sup> mice after ozone.

### **Supplemental Material, Table S3. Ingenuity Pathway Analysis gene list functions.**

This Excel file includes 4 separate tables in individual worksheets:

- Supplemental Material, Table S3, WT. IPA functions in wild-type mice exposed to ozone from genes significant via ANOVA analysis.
- Supplemental Material, Table S3, Notch 3. IPA functions in *Notch3*<sup>-/-</sup> mice exposed to ozone from genes significant via ANOVA analysis.
- Supplemental Material, Table S3, Notch 4. IPA functions in *Notch4*<sup>-/-</sup> mice exposed to ozone.
- Supplemental Material, Table S3, Intersections. IPA functions and genes in common between WT, *Notch3*<sup>-/-</sup>, and *Notch4*<sup>-/-</sup>.

### **Supplemental Material, Table S4. EPIG expression pattern results.**

EPIG analyses for wild type, *Notch3*<sup>-/-</sup>, and *Notch4*<sup>-/-</sup> mice exposed to ozone.

This Excel file includes 21 separate tables in individual worksheets:

- Supplemental Table S4, Total EPIG Output. Genes and statistics for all identified patterns.
- Supplemental Table S4, GO Enrichment for EPIG patterns.
- Supplemental Table S4, Pattern 1–Pattern 19: Gene lists for each of the 19 patterns identified by the EPIG analyses.

**Supplemental Material, Figure S1**

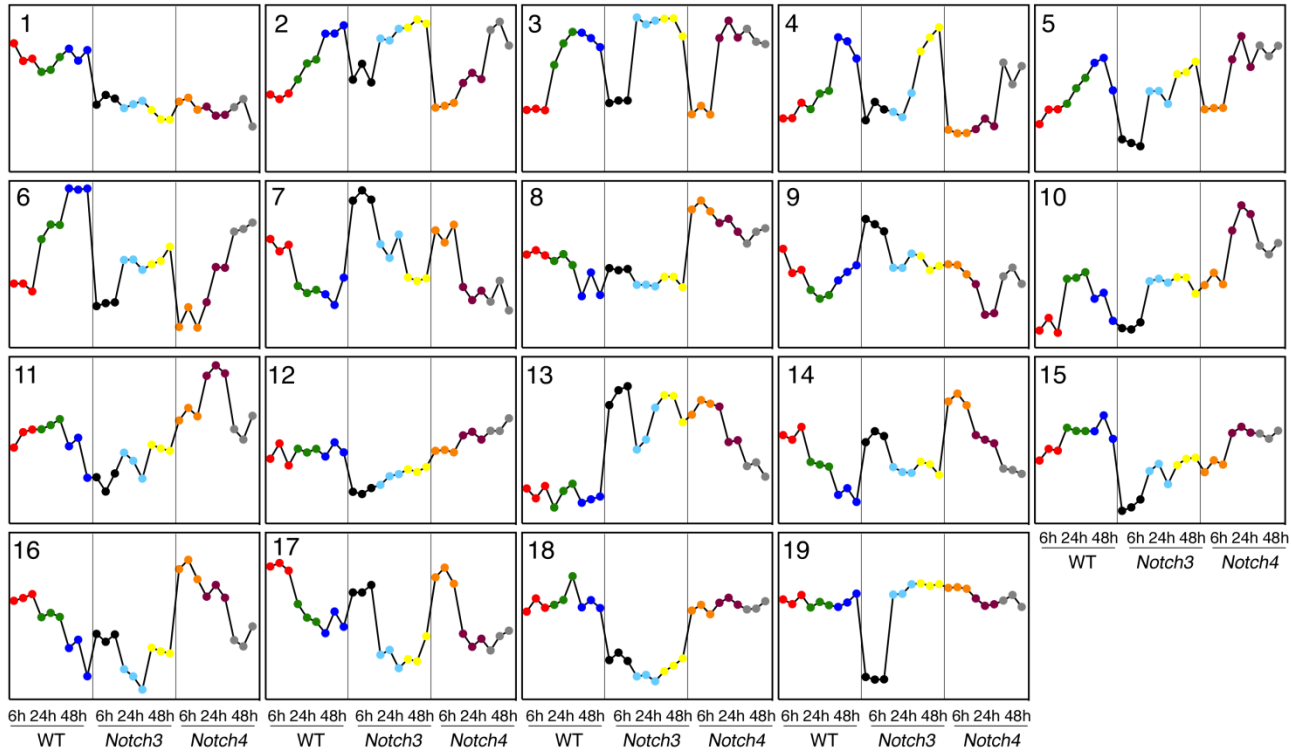

**Supplemental Material, Figure S1.** Patterns extracted by EPIG from transcripts after ozone exposure in wild type and knockout mice. 19 patterns were generated from 1723 differentially expressed transcripts. The vertical axes are the changes in gene expression (log2 intensity) relative to air-exposed controls. Colors are used to help distinguish data for each exposure time. Exposure times are also indicated on the x-axis for each panel.

Supplemental Material, Table S1. Bronchoalveolar lavage phenotype data.

| Sample                  | Air              | 6h Ozone        | 24h Ozone          | 48h Ozone          | 72h Ozone           |
|-------------------------|------------------|-----------------|--------------------|--------------------|---------------------|
| <b>Protein</b>          |                  |                 |                    |                    |                     |
| WT                      | 65.8 ± 6.6 (10)  | 80.7 ± 3.3 (4)  | 109.0 ± 6.1 (10)   | 145.6 ± 24.5 (7)   | 354.3 ± 22.3* (8)   |
| <i>Notch3</i> KO        | 64.4 ± 9.6 (10)  | 82.6 ± 11.4 (4) | 172.6 ± 12.2 (8)   | 176.9 ± 33.4 (6)   | 301.5 ± 30.7* (7)   |
| <i>Notch4</i> KO        | 55.8 ± 5.1 (10)  | 79.0 ± 7.8 (4)  | 230.4 ± 25.7*† (8) | 356.1 ± 64.3*† (7) | 589.7 ± 104.6*† (8) |
| <b>Total Cells</b>      |                  |                 |                    |                    |                     |
| WT                      | 4.8 ± 0.5 (10)   | 5.2 ± 0.8 (4)   | 6.4 ± 0.8 (10)     | 7.8 ± 0.6* (8)     | 6.1 ± 0.5 (8)       |
| <i>Notch3</i> KO        | 5.5 ± 0.5 (9)    | 4.9 ± 1.1 (4)   | 5.5 ± 0.7 (8)      | 5.8 ± 0.7 (6)      | 9.0 ± 1.2*† (7)     |
| <i>Notch4</i> KO        | 3.6 ± 0.5 (9)    | 5.2 ± 0.5 (4)   | 5.0 ± 0.9 (8)      | 6.3 ± 0.8* (7)     | 9.8 ± 0.7*† (8)     |
| <b>Macrophages</b>      |                  |                 |                    |                    |                     |
| WT                      | 4.4 ± 0.5 (10)   | 4.7 ± 0.7 (4)   | 5.7 ± 0.7 (10)     | 7.0 ± 0.6 (8)      | 5.6 ± 0.6 (8)       |
| <i>Notch3</i> KO        | 4.7 ± 0.5 (10)   | 4.3 ± 1.1 (4)   | 4.5 ± 0.7 (8)      | 4.5 ± 0.7 (5)      | 7.9 ± 1.1* (7)      |
| <i>Notch4</i> KO        | 3.1 ± 0.4 (10)   | 4.0 ± 0.7 (4)   | 3.8 ± 0.7 (8)      | 5.2 ± 0.8 (7)      | 8.7 ± 0.7*† (8)     |
| <b>Neutrophils</b>      |                  |                 |                    |                    |                     |
| WT                      | 0.01 ± 0.0 (13)  | 0.0 ± 0.0 (4)   | 0.04 ± 0.01 (10)   | 0.07 ± 0.01 (14)   | 0.07 ± 0.01 (8)     |
| <i>Notch3</i> KO        | 0.01 ± 0.0 (10)  | 0.0 ± 0.0 (4)   | 0.50 ± 0.17*†, (8) | 0.37 ± 0.09*† (5)  | 0.48 ± 0.10*† (7)   |
| <i>Notch4</i> KO        | 0.01 ± 0.01 (11) | 0.0 ± 0.0 (4)   | 0.80 ± 0.20*† (8)  | 0.42 ± 0.13*† (7)  | 0.46 ± 0.08*†# (8)  |
| <b>Epithelial Cells</b> |                  |                 |                    |                    |                     |
| WT                      | 0.32 ± 0.08 (10) | 0.45 ± 0.10 (4) | 0.38 ± 0.06 (10)   | 0.59 ± 0.20 (8)    | 0.36 ± 0.11 (8)     |
| <i>Notch3</i> KO        | 0.47 ± 0.09 (10) | 0.54 ± 0.12 (4) | 0.36 ± 0.05 (8)    | 0.46 ± 0.09 (5)    | 0.30 ± 0.03 (7)     |
| <i>Notch4</i> KO        | 0.46 ± 0.07 (10) | 0.49 ± 0.08 (4) | 0.29 ± 0.02 (8)    | 0.42 ± 0.06 (7)    | 0.47 ± 0.09 (8)     |
| <b>Eosinophils</b>      |                  |                 |                    |                    |                     |
| WT                      | 0.01 ± 0.01 (10) | 0.0 ± 0.0 (4)   | 0.0 ± 0.0 (10)     | 0.03 ± 0.01 (8)    | 0.01 ± 0.00 (8)     |
| <i>Notch3</i> KO        | 0.0 ± 0.0 (10)   | 0.0 ± 0.0 (4)   | 0.04 ± 0.02† (8)   | 0.07 ± 0.03* (5)   | 0.08 ± 0.03*†# (7)  |
| <i>Notch4</i> KO        | 0.01 ± 0.01 (10) | 0.0 ± 0.0 (4)   | 0.01 ± 0.01 (8)    | 0.04 ± 0.01 (7)    | 0.03 ± 0.01 (8)     |
| <b>Lymphocytes</b>      |                  |                 |                    |                    |                     |
| WT                      | 0.06 ± 0.02 (10) | 0.01 ± 0.01 (4) | 0.25 ± 0.15* (10)  | 0.16 ± 0.03 (8)    | 0.03 ± 0.01 (8)     |
| <i>Notch3</i> KO        | 0.05 ± 0.02 (10) | 0.04 ± 0.01 (4) | 0.05 ± 0.02 (8)    | 0.12 ± 0.05 (5)    | 0.07 ± 0.02 (7)     |
| <i>Notch4</i> KO        | 0.05 ± 0.01 (10) | 0.01 ± 0.00 (4) | 0.09 ± 0.03 (8)    | 0.11 ± 0.03 (7)    | 0.07 ± 0.02 (8)     |
| <b>Monocytes</b>        |                  |                 |                    |                    |                     |
| WT                      | 0.02 ± 0.01 (10) | 0.04 ± 0.01 (4) | 0.04 ± 0.01 (10)   | 0.02 ± 0.01 (8)    | 0.04 ± 0.01 (8)     |
| <i>Notch3</i> KO        | 0.03 ± 0.01 (10) | 0.03 ± 0.01 (4) | 0.02 ± 0.01 (8)    | 0.02 ± 0.01 (5)    | 0.12 ± 0.03* (7)    |
| <i>Notch4</i> KO        | 0.01 ± 0.00 (10) | 0.02 ± 0.01 (4) | 0.03 ± 0.03 (8)    | 0.03 ± 0.02 (7)    | 0.08 ± 0.01* (8)    |

Data are presented as mean ± SEM. Sample sizes are in parentheses. Protein is µg/ml, and cell data are x10<sup>4</sup>/ml.

Data were analyzed with 2-way ANOVA and Bonferroni post-hoc tests. \**P* < 0.05 compared to respective air controls; †*P* < 0.05 compared to WT at same time point; #*P* < 0.05 between *Notch3*<sup>-/-</sup> and *Notch4*<sup>-/-</sup> mice at the same time point.
